# Supplementary material
Source: publisher site journal article supplement (https://www.dovepress.com/article/335804)
Supplement: Supplementary file 1 [file get_supplementary_file.php]

Suppl. Table 1. The minimum inhibitory concentration (MIC) and minimum bactericidal concentration (MBC) of SME and enzymes in free or liposomal form

| Formulation | MIC ( $\mu\text{g/ml}$ ) | MBC ( $\mu\text{g/ml}$ ) |
|-------------|--------------------------|--------------------------|
| Free SME    | 0.73–1.47                | 46.88–93.75              |
| Free DNS    | >1250                    | >1250                    |
| Free PK     | >500                     | >500                     |
| Free DNS/PK | >1250 (DNS)              | >1250 (DNS)              |
| LP          | 0.73–1.47                | 46.88                    |
| LP DNS      | 1.47                     | 46.88                    |
| LP PK       | 1.47–2.93                | 93.75–187.50             |
| LP DNS/PK   | 1.47                     | 46.88–93.75              |
| MH          | 0.11                     | 3.9                      |

DNS, DNase I; LP, liposomes; MH, minocycline HCl; PK, proteinase K; SME, soyaethyl morpholinium ethosulfate.

All data are presented as the mean of three experiments  $\pm$  S.E.M.

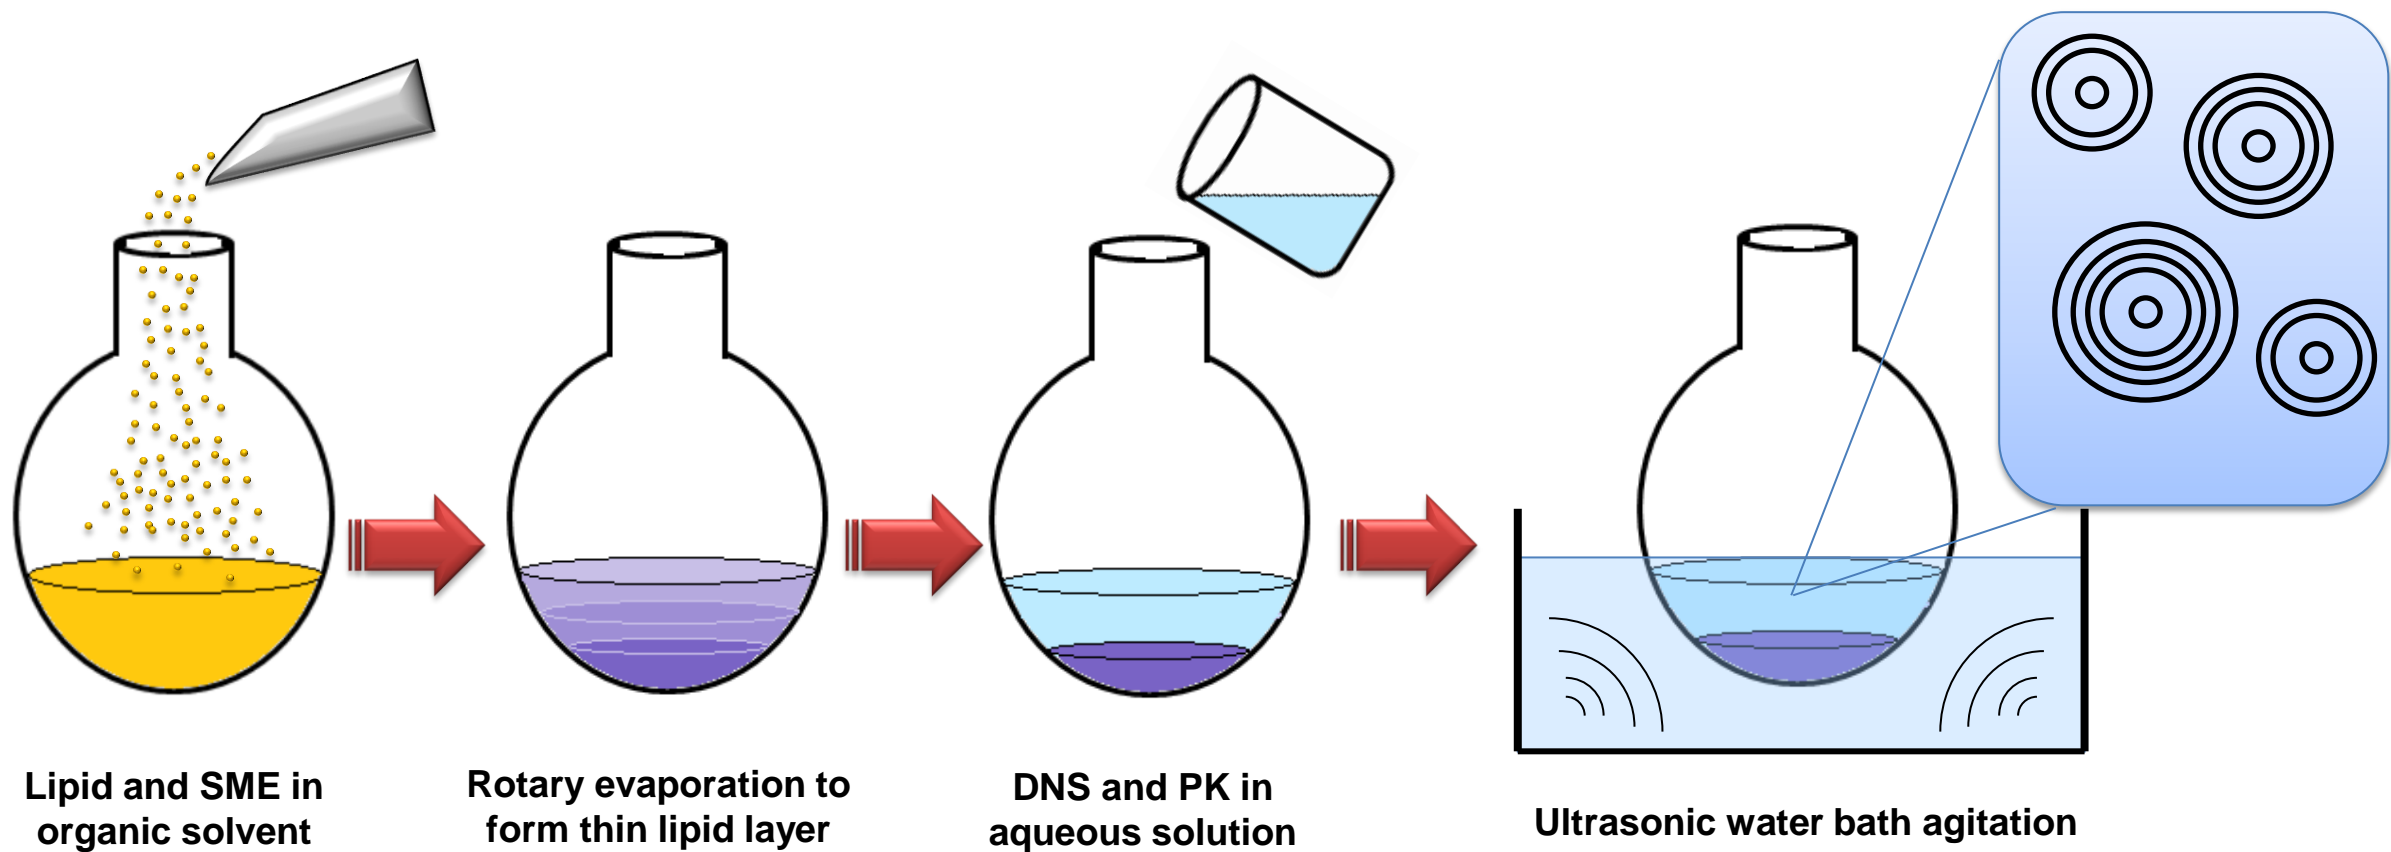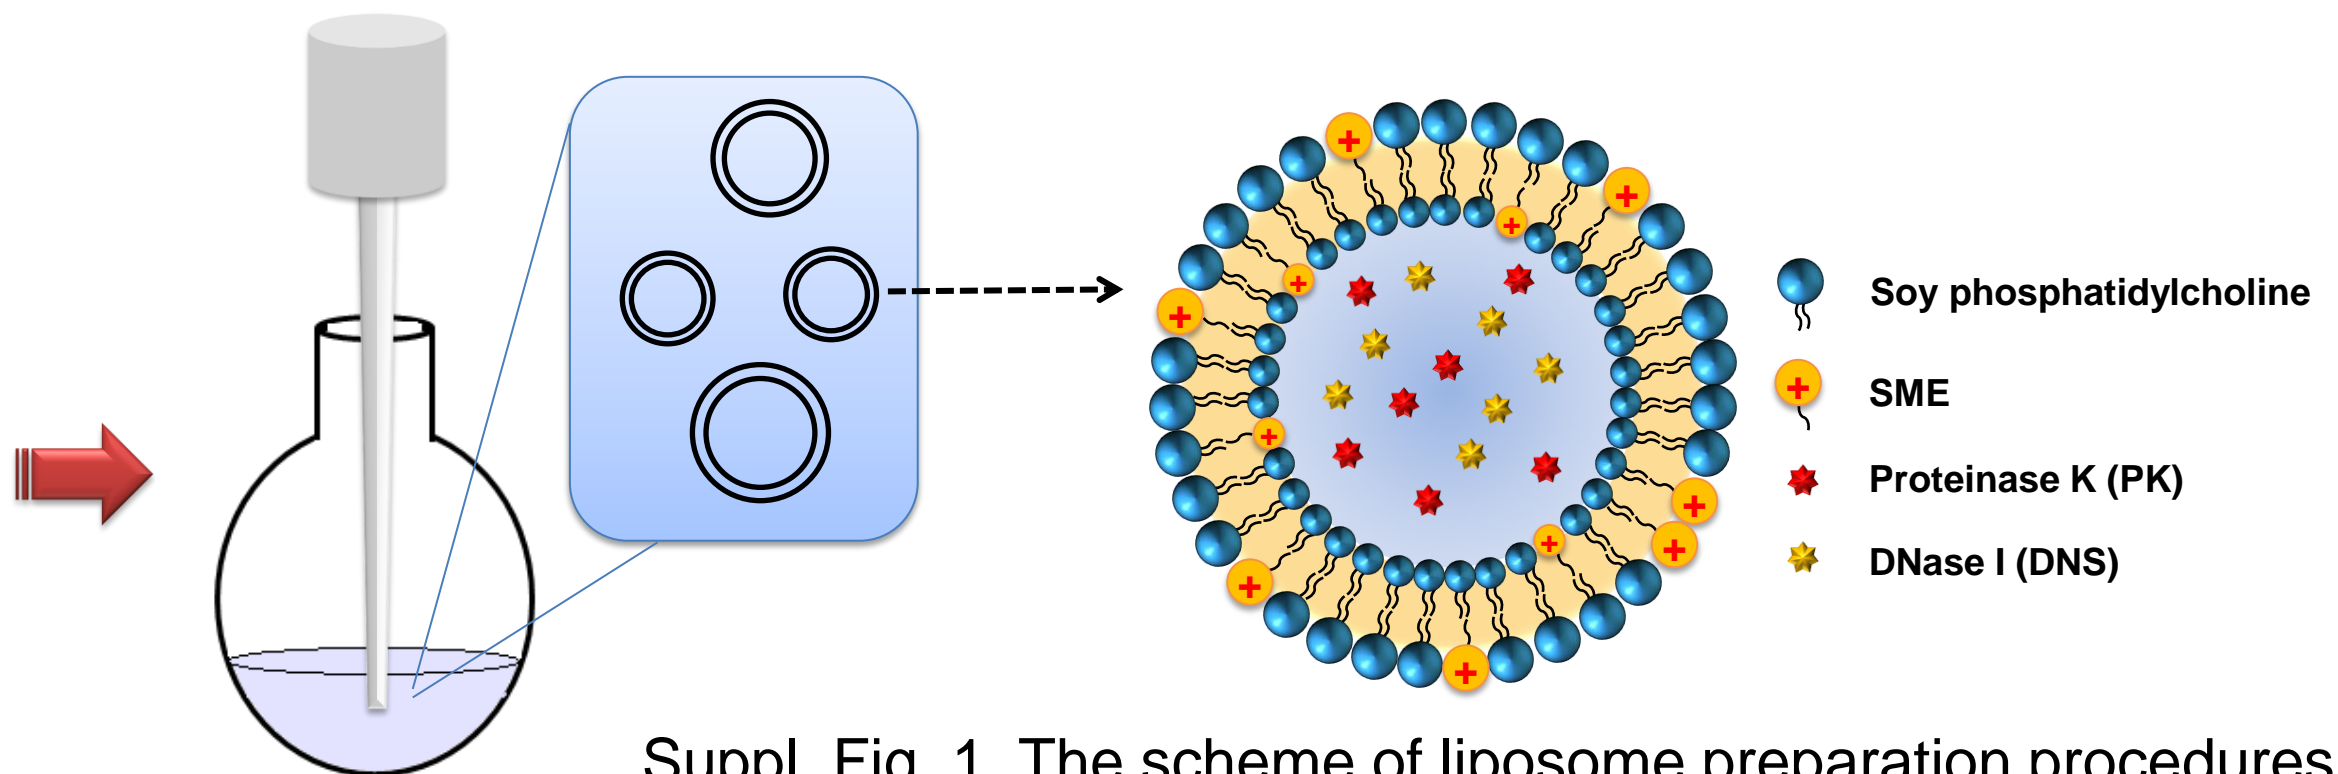

Suppl. Fig. 1. The scheme of liposome preparation procedures and the expected liposome structure

**SME**

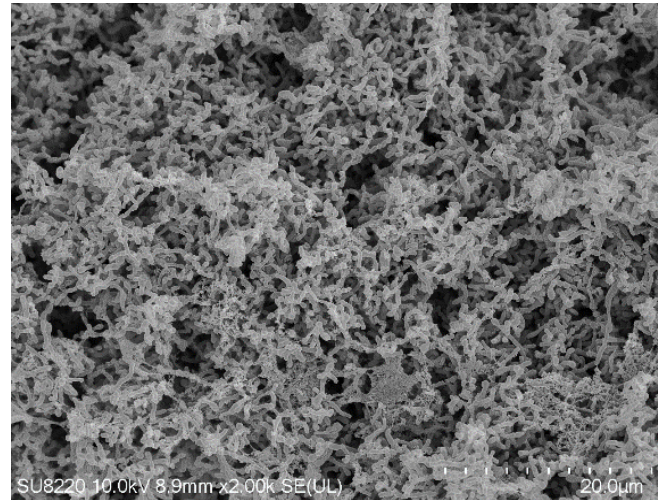

**DNS**

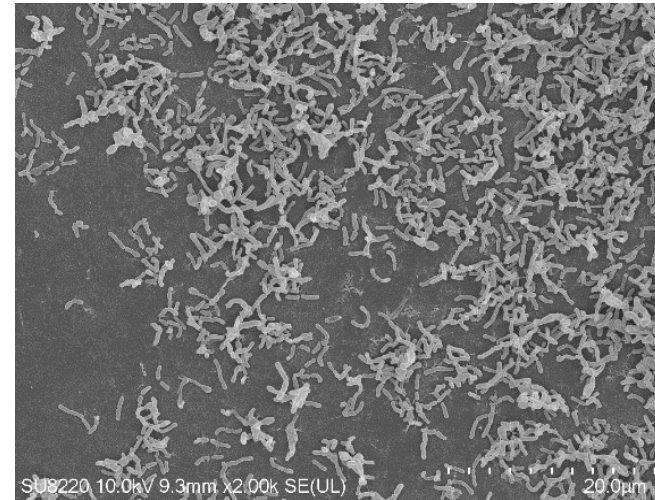

**PK**

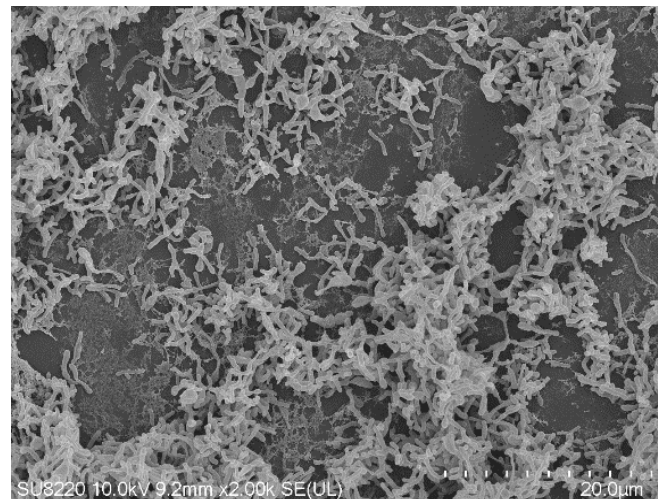

**DNS/PK**

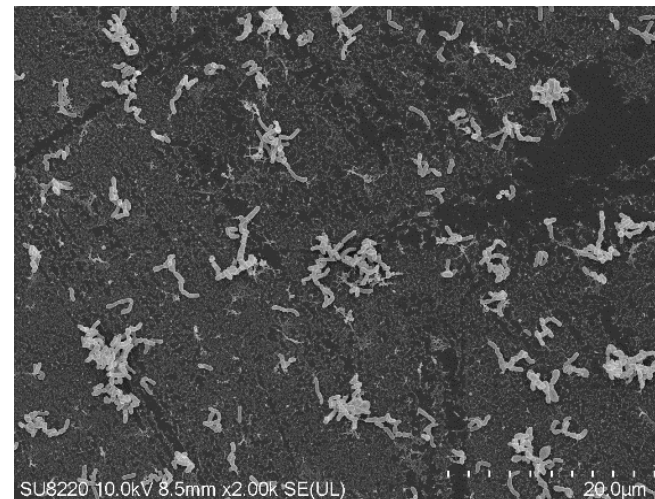

Suppl. Fig. 2. The biofilm structure observed by scanning electron microscopy after treatment with SME, DNS, and/or PK in the free form

**CTL**

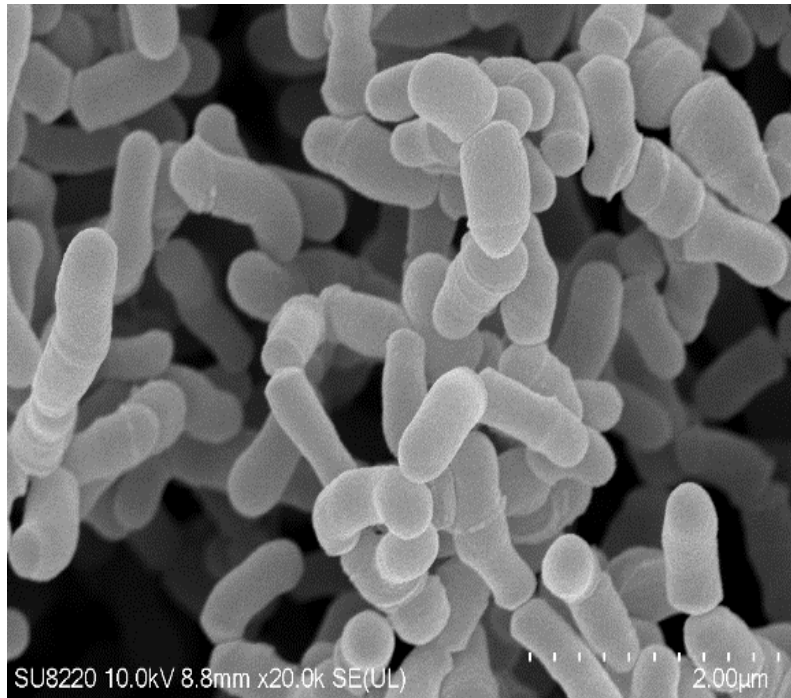

**DNS/PK**

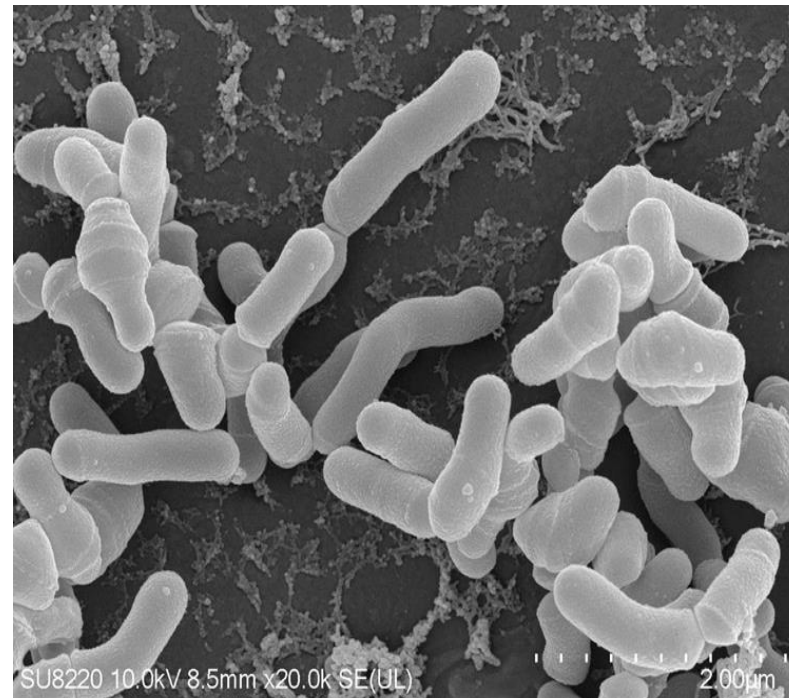

**LP DNS/PK**

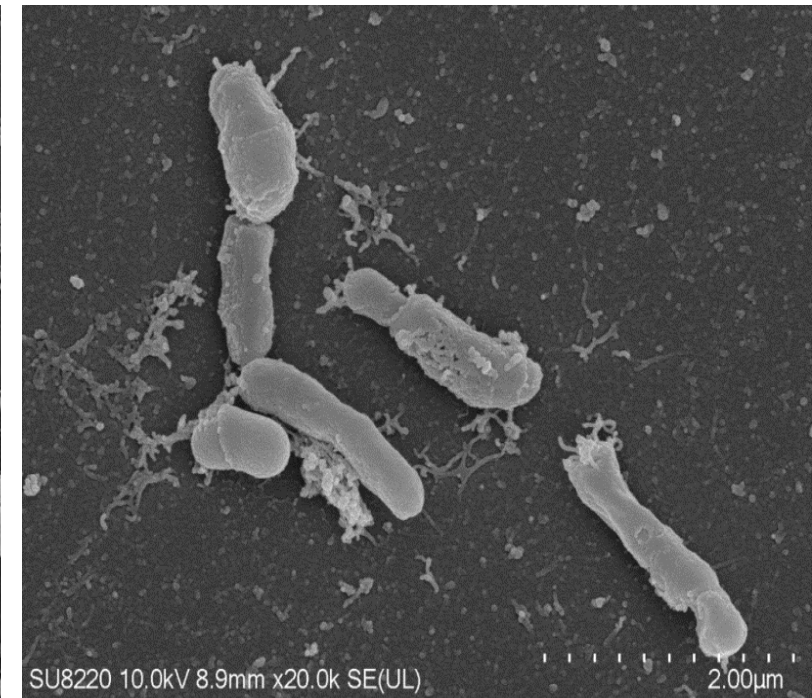

Suppl. Fig. 3. The biofilm structure observed by scanning electron microscopy after treatment with DNS/PK in the free or liposomal form with a larger magnification than Fig. 3A and Suppl. Fig. 2

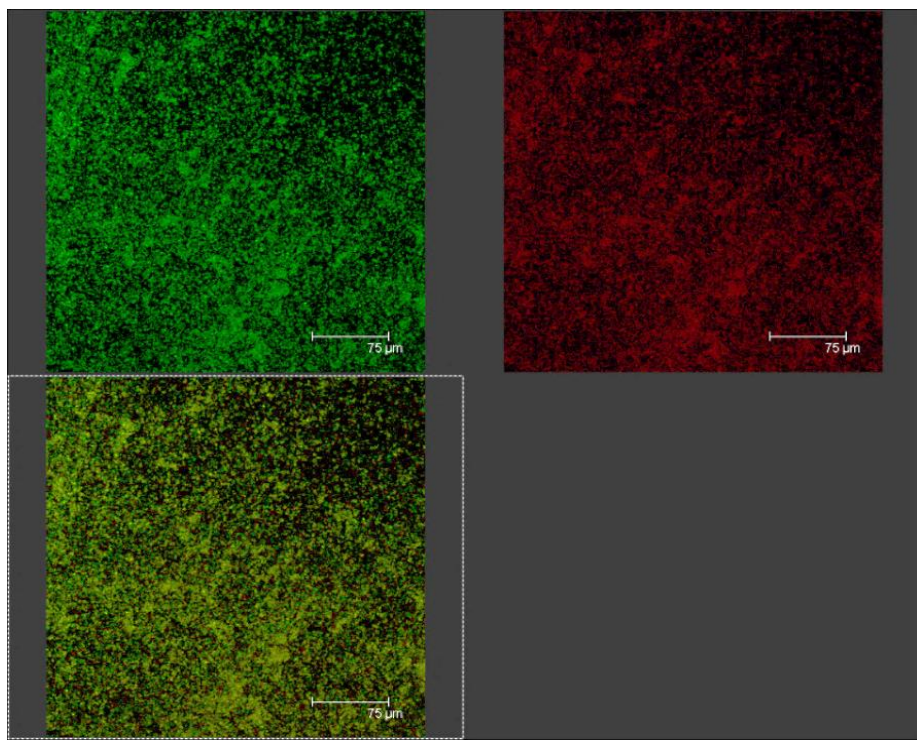

**SME**

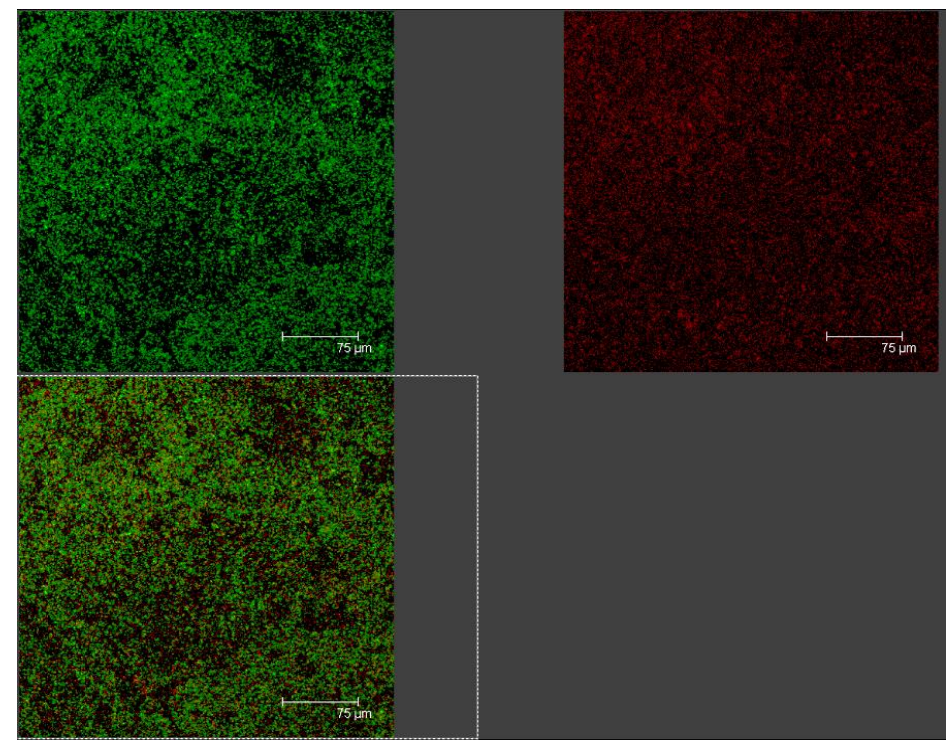

**DNS**

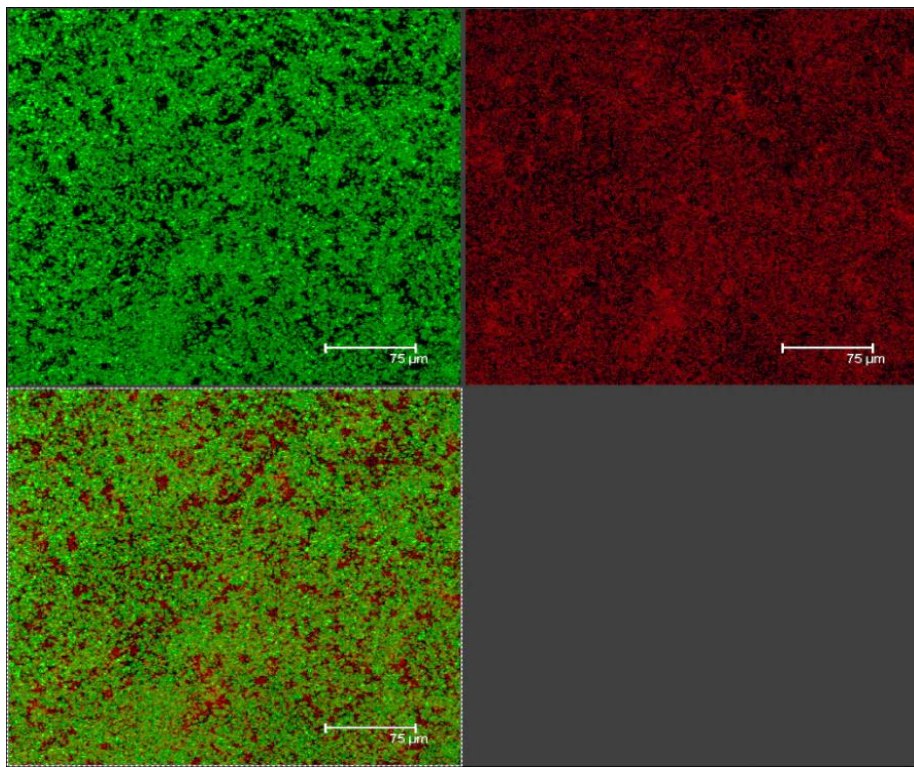

**PK**

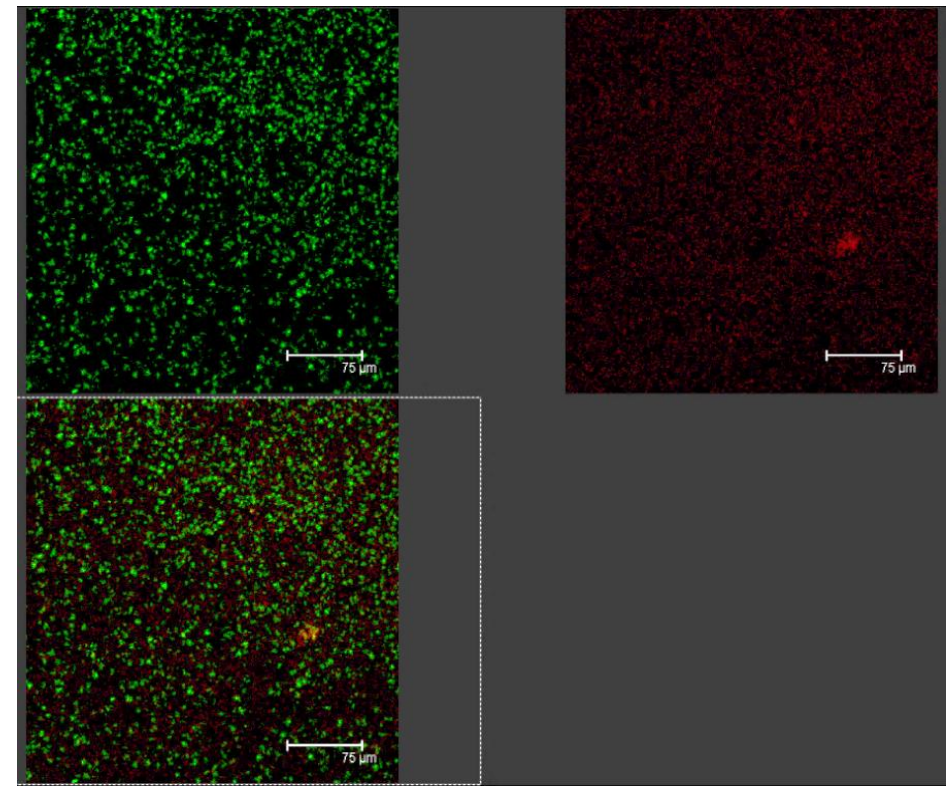

**DNS/PK**

Suppl. Fig. 4. The biofilm structure observed by confocal microscopy after treatment with SME, DNS, and/or PK in the free form
